# Supplementary material for: Absence of indoleamine 2,3-dioxygenase 2 promotes liver regeneration after partial hepatectomy in mice
Source: PubMed Central journal article supplement — Mol Med Rep. 2022 Dec 8;27(2):24. doi: 10.3892/mmr.2022.12911 (PMC9813552; doi:10.3892/mmr.2022.12911), 2022-12-08

Figure S1. Expression of the Ido1 gene is increased in intrahepatic MNCs after PHx. WT (n=3) and Ido2-KO (n=3) mice were subjected to 70% PHx. After each time point, the mice were sacrificed, and total and intrahepatic MNCs were isolated. MNCs were analyzed to assess Ido1 mRNA expression by reverse transcription-quantitative PCR. The results were normalized to the expression of 18S rRNA. NS, not significant. WT, wild-type; Ido2, indoleamine 2,3-dioxygenase 2; KO, knockout; PHx, partial hepatectomy; MNC, mononuclear cells.

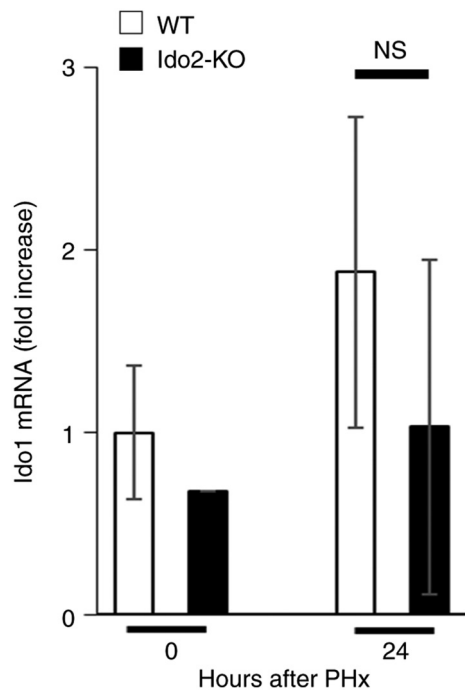

Figure S2. Expression of tryptophan metabolic enzymes in peritoneal macrophages. Peritoneal macrophages were harvested from WT and Ido2-KO mice. Nuclear protein extracts from peritoneal macrophages stimulated by LPS were analyzed using SDS-PAGE, and immunoblotting was performed with anti-Ido1, anti-Ido2, anti-Tdo2 and anti- $\beta$ -actin antibodies. Relative densitometric intensity of Ido1, Ido2 and Tdo2 were determined for each protein band and normalized to that of  $\beta$ -actin. NS, not significant; ND, not determined; WT, wild-type; Ido2, indoleamine 2,3-dioxygenase 2; KO, knockout; LPS, lipopolysaccharide; Tdo2, tryptophan 2,3-dioxygenase.

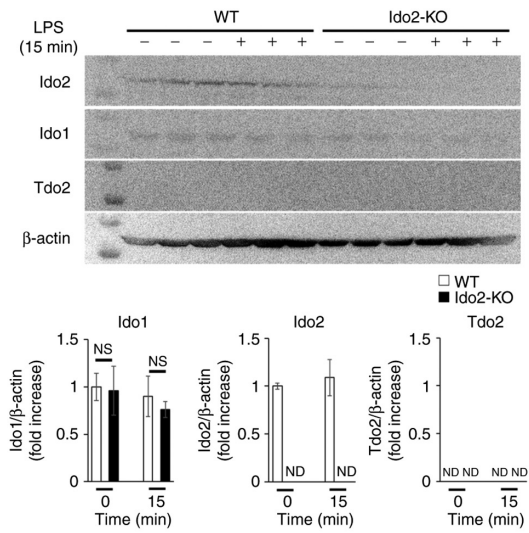

Supplement: Supplementary_Data.pdf [file Supplementary_Data.pdf]
